# Supplementary material
Source: PubMed Central journal article supplement (PMC7270627)
Supplement: mmc1.pdf [file mmc1.pdf]

# THE LANCET

## Supplementary appendix

This appendix formed part of the original submission and has been peer reviewed. We post it as supplied by the authors.

**This online publication has been corrected. The corrected version first appeared at [thelancet.com](http://thelancet.com) on March 12, 2020.**

Supplement to: Zhou F, Yu T, Du R, et al. Clinical course and risk factors for mortality of adult inpatients with COVID-19 in Wuhan, China: a retrospective cohort study. *Lancet* 2020; published online March 9. [http://dx.doi.org/10.1016/S0140-6736\(20\)30566-3](http://dx.doi.org/10.1016/S0140-6736(20)30566-3).

**Supplementary Table 1. Comorbidities of enrolled patients**

| <b>Variable</b>                               | <b>Count</b> |
|-----------------------------------------------|--------------|
| CHD                                           | 3            |
| COPD                                          | 1            |
| Carcinoma                                     | 1            |
| Diabetes                                      | 13           |
| Hypertension                                  | 30           |
| Others                                        | 12           |
| COPD + Carcinoma                              | 1            |
| Diabetes + Others                             | 2            |
| Hypertension + CHD                            | 4            |
| Hypertension + COPD                           | 1            |
| Hypertension + Diabetes                       | 12           |
| Hypertension + Others                         | 4            |
| Diabetes + CHD + CKD                          | 1            |
| Hypertension + Diabetes + CHD                 | 3            |
| Hypertension + Diabetes + Others              | 1            |
| Diabetes + CHD + COPD + Others                | 1            |
| Hypertension + Diabetes + CHD + Others        | 1            |
| Hypertension + Diabetes + CHD + COPD + CKD    | 1            |
| Hypertension + Diabetes + CHD + COPD + Others | 1            |

Abbreviation: CHD, coronary heart disease; COPD, chronic obstructive pulmonary disease; CKD, chronic kidney disease.

**Supplementary Table 2. Characteristics, interventions and outcomes of the study population in Wuhan Pulmonary Hospital and Jinyintan Hospital**

| <b>Characteristics</b>                                                                                | <b>Total<br/>N = 191</b> | <b>Wuhan Pulmonary<br/>Hospital<br/>N = 56</b> | <b>Jinyintan Hospital<br/>N = 135</b> | <b>P</b> |
|-------------------------------------------------------------------------------------------------------|--------------------------|------------------------------------------------|---------------------------------------|----------|
| Age (yrs)                                                                                             | 56.0 (46.0, 67.0)        | 55.5 (47.0, 66.0)                              | 56.0 (46.0, 67.0)                     | 0.93     |
| Male                                                                                                  | 119/191 (62%)            | 33/56 (59%)                                    | 86/135 (64%)                          | 0.54     |
| Exposure history                                                                                      | 73/191 (38%)             | 23/56 (41%)                                    | 50/135 (37%)                          | 0.60     |
| Current smoking                                                                                       | 11/191 (6%)              | 4/56 (7%)                                      | 7/135 (5%)                            | 0.60     |
| Comorbidities                                                                                         | 91/191 (48%)             | 31/56 (55%)                                    | 60/135 (44%)                          | 0.17     |
| Hypertension                                                                                          | 58/191 (30%)             | 16/56 (29%)                                    | 42/135 (31%)                          | 0.73     |
| Diabetes                                                                                              | 36/191 (19%)             | 13/56 (23%)                                    | 23/135 (17%)                          | 0.32     |
| Coronary heart disease                                                                                | 15/191 (8%)              | 6/56 (11%)                                     | 9/135 (7%)                            | 0.36     |
| Chronic obstructive lung disease                                                                      | 6/191 (3%)               | 1/56 (2%)                                      | 5/135 (4%)                            | 0.47     |
| Carcinoma                                                                                             | 2/191 (1%)               | 1/56 (2%)                                      | 1/135 (1%)                            | 0.52     |
| Chronic kidney disease                                                                                | 2/191 (1%)               | 0/56 (0%)                                      | 2/135 (1%)                            | 0.36     |
| Others                                                                                                | 22/191 (12%)             | 7/56 (13%)                                     | 15/135 (11%)                          | 0.78     |
| Respiratory rate > 24 /min                                                                            | 56/191 (29%)             | 5/56 (9%)                                      | 51/135 (38%)                          | <.0001   |
| Pulse ≥ 125 beats/min                                                                                 | 2/191 (1%)               | 1/56 (2%)                                      | 1/135 (1%)                            | 0.52     |
| Systolic blood pressure < 90 mmHg                                                                     | 1/191 (1%)               | 0/56 (0%)                                      | 1/135 (1%)                            | 0.52     |
| Fever (Temperature ≥ 37.3 °C)                                                                         | 180/191 (94%)            | 54/56 (96%)                                    | 126/135 (93%)                         | 0.38     |
| Cough                                                                                                 | 151/191 (79%)            | 43/56 (77%)                                    | 108/135 (80%)                         | 0.62     |
| Sputum                                                                                                | 44/191 (23%)             | 12/56 (21%)                                    | 32/135 (24%)                          | 0.73     |
| Myalgia                                                                                               | 29/191 (15%)             | 7/56 (13%)                                     | 22/135 (16%)                          | 0.51     |
| Fatigue                                                                                               | 44/191 (23%)             | 13/56 (23%)                                    | 31/135 (23%)                          | 0.97     |
| Diarrhea                                                                                              | 9/191 (5%)               | 4/56 (7%)                                      | 5/135 (4%)                            | 0.32     |
| Nausea or vomiting                                                                                    | 7/191 (4%)               | 1/56 (2%)                                      | 6/135 (4%)                            | 0.34     |
| <b>Laboratory findings</b>                                                                            |                          |                                                |                                       |          |
| White blood cell count (× 10 <sup>9</sup> /L)                                                         | 6.2 (4.5, 9.5)           | 4.8 (3.7, 7.9)                                 | 6.9 (4.9, 10.3)                       | 0.0002   |
| 4-10                                                                                                  | 119/191 (62%)            | 35/56 (63%)                                    | 84/135 (62%)                          | 0.0003   |
| <4                                                                                                    | 32/191 (17%)             | 17/56 (30%)                                    | 15/135 (11%)                          |          |
| >10                                                                                                   | 40/191 (21%)             | 4/56 (7%)                                      | 36/135 (27%)                          |          |
| Lymphocyte count (× 10 <sup>9</sup> /L)                                                               | 1.0 (0.6, 1.3)           | 1.0 (0.8, 1.3)                                 | 0.9 (0.6, 1.3)                        | 0.31     |
| < 0.8                                                                                                 | 77/191 (40%)             | 19/56 (34%)                                    | 58/135 (43%)                          | 0.25     |
| Hemoglobin (g/dl)  | 128.0 (119.0, 140.0)     | 129.0 (122.0, 141.5)                           | 127.0 (117.0, 139.0)                  | 0.18     |
| Anemia                                                                                                | 29/191 (15%)             | 5/56 (9%)                                      | 24/135 (18%)                          | 0.12     |
| Platelet count (× 10 <sup>9</sup> /L)                                                                 | 206.0 (155.0, 262.0)     | 197.5 (152.5, 242.0)                           | 217.0 (155.0, 272.0)                  | 0.16     |
| < 100                                                                                                 | 13/191 (7%)              | 4/56 (7%)                                      | 9/135 (7%)                            | 0.91     |
| Albumin (g/L)                                                                                         | 32.3 (29.1, 35.8)        | 36.0 (33.0, 38.2)                              | 30.7 (28.0, 34.2)                     | <.0001   |
| Alanine transaminase (U/L)                                                                            | 30.0 (17.0, 46.0)        | 19.5 (13.0, 32.0)                              | 34.0 (22.0, 51.0)                     | <.0001   |

| Characteristics                                                                                  | Total<br>N = 191      | Wuhan Pulmonary<br>Hospital<br>N = 56 | Jinyintan Hospital<br>N = 135 | P      |
|--------------------------------------------------------------------------------------------------|-----------------------|---------------------------------------|-------------------------------|--------|
| > 40                                                                                             | 59/189 (31%)          | 9/54 (17%)                            | 50/135 (37%)                  | 0.0063 |
| Creatinine > 133 (μmol/L)                                                                        | 8/186 (4%)            | 1/51 (2%)                             | 7/135 (5%)                    | 0.30   |
| Lactate dehydrogenase (U/L)                                                                      | 300.0 (234.0, 407.0)  | 249.0 (224.0, 318.0)                  | 323.0 (241.0, 452.0)          | 0.0021 |
| > 245                                                                                            | 123/184 (67%)         | 26/49 (53%)                           | 97/135 (72%)                  | 0.017  |
| Creatine kinase (U/L)                                                                            | 21.5 (13.0, 72.4)     | 62.2 (41.0, 201.0)                    | 17.5 (12.0, 44.0)             | <.0001 |
| > 185                                                                                            | 22/168 (13%)          | 10/36 (28%)                           | 12/132 (9%)                   | 0.0063 |
| Cardiac Troponin I (ng/ml)                                                                       | 4.1 (2.0, 14.1)       | 3.0 (3.0, 3.0)                        | 4.8 (1.8, 16.2)               | 0.47   |
| > 28                                                                                             | 24/145 (17%)          | 0/13 (0%)                             | 24/132 (18%)                  | 0.026  |
| Prothrombin time (s)                                                                             | 11.6 (10.6, 13.0)     | 13.6 (12.6, 14.5)                     | 11.1 (10.3, 11.9)             | <.0001 |
| < 16                                                                                             | 171/182 (94%)         | 40/47 (85%)                           | 131/135 (97%)                 | 0.0063 |
| ≥ 16                                                                                             | 11/182 (6%)           | 7/47 (15%)                            | 4/135 (3%)                    |        |
| D-dimer (μg/L)  | 0.8 (0.4, 3.2)        | 0.3 (0.2, 0.9)                        | 1.0 (0.5, 3.8)                | <.0001 |
| > 0.5                                                                                            | 45/172 (26%)          | 6/37 (16%)                            | 39/135 (29%)                  | <.0001 |
| > 1                                                                                              | 72/172 (42%)          | 6/37 (16%)                            | 66/135 (49%)                  |        |
| Serum Ferritin (μg/L)                                                                            | 722.0 (377.2, 1435.3) | NA                                    | 722.0 (377.2, 1435.3)         | NA     |
| > 300                                                                                            | 102/128 (80%)         | NA                                    | 102/128 (80%)                 | NA     |
| Procalcitonin (ng/mL)                                                                            | 0.1 (0.1, 0.1)        | 0.0 (0.0, 0.1)                        | 0.1 (0.1, 0.1)                | <.0001 |
| Interleukin 6 (pg/mL)                                                                            | 7.4 (5.3, 10.8)       | NA                                    | 7.4 (5.3, 10.8)               | NA     |
| < 0.1                                                                                            | 114/164 (70%)         | 21/30 (70%)                           | 93/134 (69%)                  | 0.97   |
| < 0.25                                                                                           | 30/164 (18%)          | 6/30 (20%)                            | 24/134 (18%)                  |        |
| < 0.5                                                                                            | 6/164 (4%)            | 1/30 (3%)                             | 5/134 (4%)                    |        |
| ≥ 0.5                                                                                            | 14/164 (9%)           | 2/30 (7%)                             | 12/134 (9%)                   |        |
| <b>Imaging features</b>                                                                          |                       |                                       |                               |        |
| Consolidation                                                                                    | 112/191 (59%)         | 28/56 (50%)                           | 84/135 (62%)                  | 0.12   |
| Ground-glass opacity                                                                             | 136/191 (71%)         | 47/56 (84%)                           | 89/135 (66%)                  | 0.012  |
| Bilateral pulmonary infiltration                                                                 | 143/191 (75%)         | 54/56 (96%)                           | 89/135 (66%)                  | <.0001 |
| <b>Treatments</b>                                                                                |                       |                                       |                               |        |
| Antibiotic                                                                                       | 181/191 (95%)         | 52/56 (93%)                           | 129/135 (96%)                 | 0.46   |
| Antiviral                                                                                        | 41/191 (21%)          | 15/56 (27%)                           | 26/135 (19%)                  | 0.25   |
| Corticosteroid                                                                                   | 57/191 (30%)          | 24/56 (43%)                           | 33/135 (24%)                  | 0.011  |
| Intravenous immunoglobulin                                                                       | 46/191 (24%)          | 8/56 (14%)                            | 38/135 (28%)                  | 0.041  |
| High-flow nasal cannula oxygen therapy                                                           | 41/191 (21%)          | 6/56 (11%)                            | 35/135 (26%)                  | 0.020  |
| Noninvasive mechanical ventilation                                                               | 26/191 (14%)          | 2/56 (4%)                             | 24/135 (18%)                  | 0.0092 |
| Invasive mechanical ventilation                                                                  | 32/191 (17%)          | 6/56 (11%)                            | 26/135 (19%)                  | 0.15   |
| ECMO                                                                                             | 3/191 (2%)            | 0/56 (0%)                             | 3/135 (2%)                    | 0.26   |
| Renal replacement therapy                                                                        | 10/191 (5%)           | 1/56 (2%)                             | 9/135 (7%)                    | 0.13   |
| SOFA                                                                                             | 2.0 (1.0, 4.0)        | 1.5 (0.0, 3.0)                        | 2.0 (1.0, 4.0)                | 0.0012 |
| CURB-65                                                                                          | 0.0 (0.0, 2.0)        | 0.0 (0.0, 1.0)                        | 0.0 (0.0, 2.0)                | 0.24   |
| 0-1                                                                                              | 141/188 (75%)         | 46/53 (87%)                           | 95/135 (70%)                  | 0.016  |
| 2                                                                                                | 32/188 (17%)          | 3/53 (6%)                             | 29/135 (21%)                  |        |

| <b>Characteristics</b>                   | <b>Total<br/>N = 191</b> | <b>Wuhan Pulmonary<br/>Hospital<br/>N = 56</b> | <b>Jinyintan Hospital<br/>N = 135</b> | <b>P</b> |
|------------------------------------------|--------------------------|------------------------------------------------|---------------------------------------|----------|
| 3-5                                      | 15/188 (8%)              | 4/53 (8%)                                      | 11/135 (8%)                           |          |
| Duration from illness onset to admission | 11.0 (8.0, 14.0)         | 9.5 (7.0, 13.0)                                | 11.0 (8.0, 14.0)                      | 0.0061   |
| Duration from illness onset to fever     | 1.0 (1.0, 1.0)           | 1.0 (1.0, 3.0)                                 | 1.0 (1.0, 1.0)                        | 0.027    |
| Duration from illness onset to cough     | 1.0 (1.0, 3.0)           | 1.0 (1.0, 3.5)                                 | 1.0 (1.0, 3.0)                        | 0.79     |
| Duration from illness onset to dyspnea   | 7.0 (4.0, 9.0)           | 5.5 (2.0, 9.0)                                 | 7.0 (4.0, 10.0)                       | 0.43     |
| Duration from illness onset to ARDS      | 12.0 (8.0, 15.0)         | 11.0 (7.5, 14.5)                               | 12.0 (8.0, 15.0)                      | 0.65     |
| ICU admission                            | 50/191 (26%)             | 6/56 (11%)                                     | 44/135 (33%)                          | 0.0017   |
| Hospital length of stay (days)           | 11.0 (7.0, 14.0)         | 9.0 (5.0, 13.5)                                | 11.0 (8.0, 15.0)                      | 0.073    |
| ICU length of stay (days)                | 8.0 (4.0, 12.0)          | 10.0 (6.0, 21.0)                               | 7.5 (3.5, 11.5)                       | 0.55     |
| Death                                    | 54/191 (28%)             | 8/56 (14%)                                     | 46/135 (34%)                          | 0.0057   |

Note. Data were as median (IQR) or number (proportion). P values were calculated by Mann-Whitney U test,  $\chi^2$  test or Fisher's exact test where appropriate. Abbreviation: SOFA, sequential organ failure assessment; ICU, intensive care unit; ARDS, acute respiratory distress syndrome.

**Supplementary Table 3. Risk factors associated with in-hospital death for study patients in generalized linear model**

| Parameter                                                                                               | Level      | Estimate | Standard Error | P value |
|---------------------------------------------------------------------------------------------------------|------------|----------|----------------|---------|
| Intercept                                                                                               |            | -12.73   | 3.1            | <.0001  |
| Age                                                                                                     |            | 0.096    | 0.033          | 0.0040  |
| Coronary heart disease                                                                                  | No         | Ref      |                |         |
|                                                                                                         | Yes        | 1.00     | 1.16           | 0.3857  |
| SOFA                                                                                                    |            | 1.73     | 0.40           | <.0001  |
| Lymphocyte count ( $\times 10^9/L$ )                                                                    |            | -1.63    | 1.11           | 0.14    |
| D-dimer ( $\mu g/L$ )  | $\leq 0.5$ | Ref      |                |         |
|                                                                                                         | $> 0.5$    | 0.58     | 1.23           | 0.64    |
|                                                                                                         | $> 1$      | 2.67     | 1.05           | 0.011   |

Note: the generalized linear model has been adjusted for study center; SOFA, sequential organ failure assessment;

**Supplementary Figure 1. Clinical courses of different symptoms in survivors and non-survivors.**

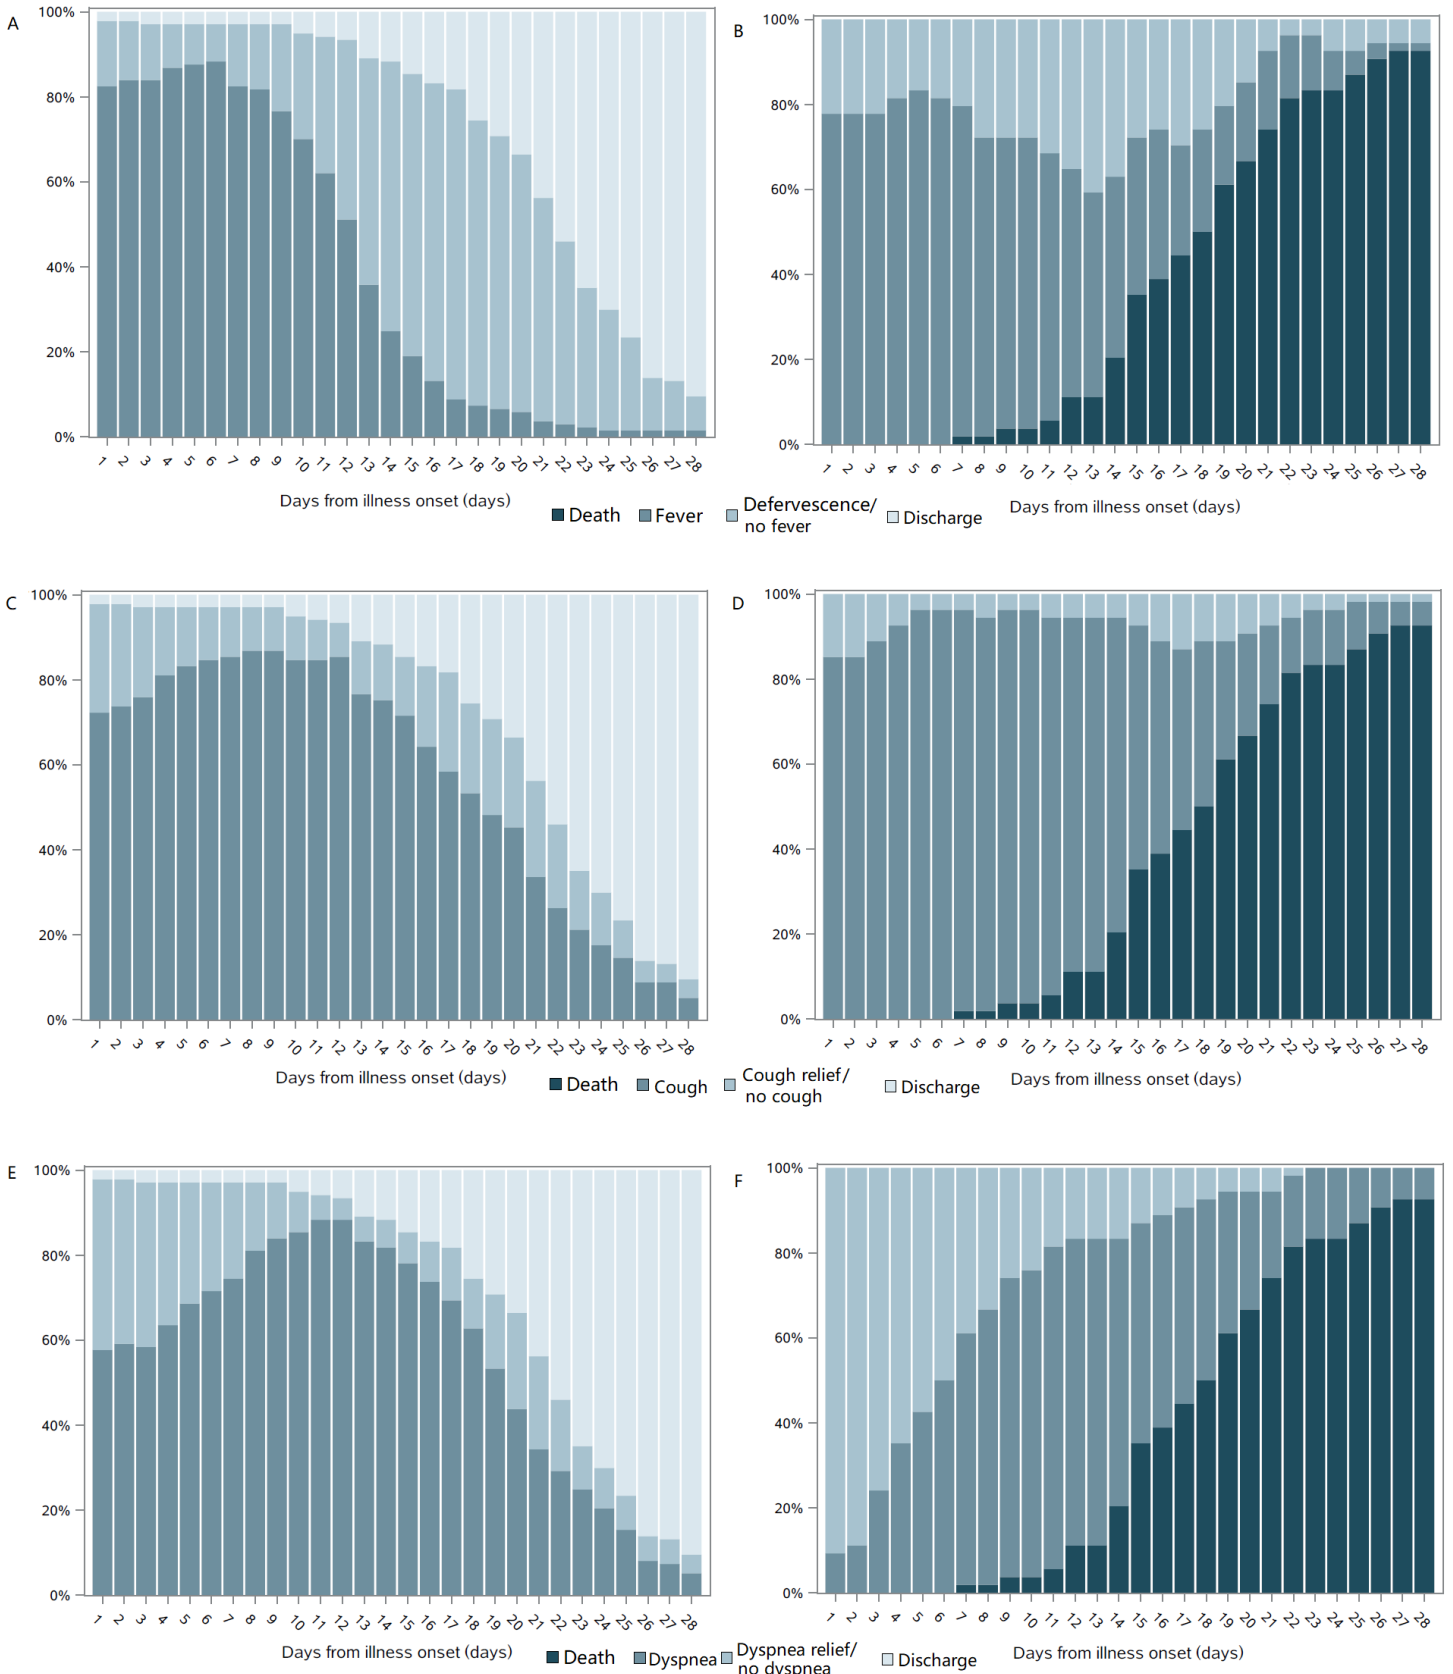

- 1A. The dynamic proportions of cases with fever, defervescence/no fever, or discharge in survivors.
- 1B. The dynamic proportions of cases with defervescence/no fever, fever, or death in non-survivors.
- 1C. The dynamic proportions of cases with cough, cough relief/no cough, or discharge in survivors.
- 1D. The dynamic proportions of cases with cough relief/no cough, cough, or death in non-survivors.
- 1E. The dynamic proportions of cases with dyspnea, dyspnea relief/no dyspnea, or discharge in survivors.
- 1F. The dynamic proportions of cases with dyspnea relief/no dyspnea, dyspnea, or death in non-survivors.
